# Supplementary material
Source: Springer Nature journal article supplement (https://www.springermedizin.de/resource/supplementary/12891_2009_718_MOESM1_ESM.pdf/9506252)
Supplement: MOESM1 [file 9506252]

Patients with proximal humerus fractures will be flagged up by radiology/screened by designated person as potentially eligible

Patients with proximal humerus fractures are assessed<sup>1</sup> by orthopaedic surgeon for eligibility in fracture clinic or trauma ward

Patient must meet the following **inclusion criterion** before completing any forms: "Aged 16 or above, presenting within three weeks of their injury with a radiologically confirmed displaced fracture of the proximal humerus with involvement of the surgical neck".

Not eligible

Complete and post to YTU:  
- *Study Eligibility Form*

Eligible – obtain consent<sup>2</sup>

Consent

Complete following forms:  
- *Study Eligibility Form*  
- *Consent Status Form*  
- *Consent Form*  
- *Baseline Form*

No consent

Complete and post to YTU:  
- *Study Eligibility Form*  
- *Consent Status Form*

- Contact randomisation service (online or telephone) to randomise patient and post above forms to YTU

Surgical Treatment

Non-surgical Treatment

Complete forms and post to YTU within one month from randomisation:  
- *Surgical Form*<sup>3</sup> - *Treatment Confirmation Form* - *Copies of X-rays*

Complete forms and post to YTU:  
- *In-patient Episode Form*<sup>4</sup> - *Physiotherapy Treatment Forms*

Complete forms and post to YTU:  
- *One-Year Follow-up Form* & *Two-Year Follow-up Form*

Complete and post to YTU as necessary during the trial:  
- *Adverse Event Form* & *Trial Exit Form*

<sup>1</sup> The series of radiographs to confirm the fracture should be e.g. Anteroposterior, Axillary (or modified axillary), Scapular Y-Lateral.

<sup>2</sup> After assessing eligibility, patients may need at least 24 hours to decide about consenting to take part.

<sup>3</sup> Surgical Form also to be completed for any patient randomised to non-surgical treatment who then undergoes surgery.

<sup>4</sup> In-patient Episode Form for a patient not randomised to surgery is not required if patient not admitted to hospital.
